# Supplementary material
Source: Research Square preprint supplement (doi:10.21203/rs.3.rs-9214384/v1)
Supplement: Supplementary file 1 [file 3be4ee4ab908c255c5f70b2c.xlsx]

## Sheet: LITTERATURE_shell
				mg kg-1		mg kg-1		mg kg-1		mg kg-1		mg kg-1		mg kg-1		mg kg-1		mg kg-1		mg kg-1		mg kg-1		mg kg-1		mg kg-1		mg kg-1		mg kg-1		mg kg-1		mg kg-1		mg kg-1
Country	Phylum: Mollusca/Class: Bivalva	Weight	shell	La	±SD	Ce	±SD	Pr	±SD	Nd	±SD	Sm	±SD	Eu	±SD	Gd	±SD	Tb	±SD	Dy	±SD	Y	±SD	Ho	±SD	Er	±SD	Tm	±SD	Yb	±SD	Lu	±SD	∑REE	±SD	∑REY	±SD	Reference_year
France	Corbicula fluminea	DW	shell	0.0101		0.0143		0.00199		0.00817		0.0017		0.00043		0.00196		0.00026		0.00154				0.00032		0.00085				0.00063		8e-05		0.04233		0.04233		2015	Merschel and Bau (2015)
Germany (media)	Corbicula fluminea (media)		shell (average)	0.498625	0.69217	0.078463	0.06457	0.016945	0.0174186	0.048682	0.0430631	0.009586	0.00790042	0.001728	0.00134035	0.007786	0.00607749	0.00089	0.000648194	0.004668	0.00338693			0.000858	0.000613221	0.002264	0.00160587			0.001577	0.00115769	0.000218	0.000155406	0.67229	0.806465	0.67229	0.806465	2015	Merschel and Bau (2015)
Germany (Bremer)	Corbicula fluminea (2.5-2.8)	DW	shell	0.0683		0.0903		0.0156		0.0659		0.0147		0.00302		0.0138		0.00162		0.00892		0.0593		0.00163		0.00428		0.000491		0.00261		0.000329		0.2915		0.293137		2025	Zhang et 2025
Germany (Hamburg)	Corbicula fluminea (2.5-2.8)	DW	shell	0.00789		0.00845		0.000893		0.00373		0.000894		0.000203		0.0011		0.000155		0.00104		0.0086		0.00021		0.000688		9.26e-05		0.000575		7.11e-05		0.0259917		0.0298007		2025	Zhang et 2025
Germany (Worms)	Corbicula fluminea (2.5-2.8)	DW	shell	0.0458		0.0432		0.0103		0.0425		0.00752		0.00146		0.00616		0.000685		0.00368		0.022		0.000632		0.0017		0.000204		0.00113		0.000143		0.165114		0.176242		2025	Zhang et 2025
Germany (Bonn)	Corbicula fluminea (2.5-2.8)	DW	shell	0.904		0.159		0.036		0.108		0.0182		0.00366		0.0163		0.00166		0.00954		0.0629		0.0018		0.00486		0.000599		0.00341		0.000459		1.26749		1.27249		2025	Zhang et 2025
Austria (Vienna)	Corbicula fluminea (2.5-2.8)	DW	shell	0.0445		0.0568		0.00947		0.0376		0.00736		0.00152		0.00676		0.000823		0.00455		0.0312		0.000823		0.00219		0.000268		0.00152		0.000201		0.174385		0.181981		2025	Zhang et 2025
Slovakia (Bratislava)	Corbicula fluminea (2.5-2.8)	DW	shell (average)	0.08725	0.0033234	0.08825	0.00346482	0.01815	0.000212132	0.07515	0.00205061	0.0134	0.000282843	0.002705	0.000106066	0.0116	0.000707107	0.001425	0.00013435	0.007555	0.000742462	0.0479	0.00367696	0.001415	0.000162635	0.00366	0.000480833	0.0004465	6.01041e-05	0.002515	0.000346482	0.0003285	3.74767e-05	0.31385	0.00599061	0.325061	0.00305291	2025	Zhang et 2025
Hungary (Budapest)	Corbicula fluminea (2.5-2.8)	DW	shell (average)	0.13055	0.153371	0.179	0.212132	0.02689	0.0311268	0.1121	0.129966	0.020265	0.0228183	0.004344	0.0048451	0.01827	0.0201243	0.002337	0.00253568	0.01348	0.0145947	0.09405	0.09751	0.0025805	0.00281358	0.00704	0.00758018	0.0008795	0.00094823	0.00506	0.00545886	0.000663	0.000717006	0.523459	0.609032	0.563116	0.624656	2025	Zhang et 2025
Germany (Koblenz)	Dreissena polymorpha	DW	shell	2.9		0.239		0.0364		0.139		0.0302		0.00525		0.0224		0.00254		0.0146		0.101		0.00272		0.00735		0.00092		0.0053		0.000674		3.40635		3.50735		2025	Zhang et 2025
Germany (Worms)	Dreissena bugensis	DW	shell	0.235		0.236		0.0467		0.207		0.0412		0.00867		0.0374		0.00456		0.0261		0.166		0.00501		0.0128		0.00159		0.00909		0.00118		0.8723		1.0383		2025	Zhang et 2025
Germany (Ulm)	Dreissena polymorpha	DW	shell	0.0572		0.0791		0.013		0.0545		0.0102		0.00216		0.00907		0.00133		0.00781		0.0494		0.00142		0.000667		0.000463		0.00267		0.000343		0.239933		0.289333		2025	Zhang et 2025
Slovakia (Bratislava)	Dreissena bugensis (media)		shell (average)	0.36	0.329512	0.3735	0.303349	0.0738	0.0681651	0.2905	0.266579	0.04885	0.0429214	0.01006	0.00868327	0.0438	0.0371938	0.005355	0.00437699	0.0294	0.0237588	0.19575	0.146018	0.00524	0.00407294	0.01397	0.0105076	0.001751	0.00129966	0.010095	0.00736098	0.0013235	0.000928431	1.26764	1.10871	1.38714	1.08212	2025	Zhang et 2025
Slovakia (Bratislava)	Dreissena polymorpha (media)		shell (average)	0.2765	0.0516188	0.316	0.0282843	0.0562	0.0086267	0.2265	0.0346482	0.039	0.00367696	0.007935	0.000473762	0.0347	0.000848528	0.004425	7.77817e-05	0.0239	0.000989949	0.169	0.0155563	0.004375	0.000247487	0.0118	0.00113137	0.00147	0.000127279	0.008455	0.000685894	0.00115	8.48528e-05	1.01241	0.0682641	1.03715	0.0669842	2025	Zhang et 2025
Italy (Lake Maggiore)	Unio	DW	shell (average)	0.110421	0.0421064	0.168453	0.0693008	0.0223186	0.0090063	0.0904588	0.0370952	0.0188456	0.00779541	0.0055393	0.00174142	0.0189336	0.00796752	0.00259406	0.00121501	0.0148572	0.00616812	0.0919712	0.0340218	0.0027237	0.00117344	0.00747252	0.00275298	0.000796207	0.000392853	0.00581636	0.00250299	0.000771396	0.000357753	0.470002	0.189576	0.561973	0.220442	2025	Fontanella et al. 2025
Italy (Lake Orta - Orta)	Unio	DW	shell (average)	0.0634759	0.019815	0.11999	0.042196	0.0129688	0.00425198	0.0518882	0.0175603	0.0100244	0.0038459	0.00435367	0.000727944	0.00922828	0.00336408	0.00115557	0.000467855	0.00759753	0.00254114	0.0429699	0.0141648	0.00131312	0.000520316	0.00366236	0.00134044	0.000376742	0.000124335	0.00259075	0.0012066	0.000351338	0.000164836	0.288976	0.0981268	0.331946	0.111	2025	Fontanella et al. 2025
Italy (Lake Orta - Gozzano)	Unio	DW	shell (average)	0.0583776	0.0407315	0.112624	0.0766535	0.012757	0.00971724	0.0531898	0.0398217	0.0106538	0.00900627	0.00653816	0.00223604	0.0104202	0.00841219	0.00157121	0.00138979	0.00978224	0.00932094	0.054197	0.0509465	0.00191967	0.00196773	0.00516406	0.00514521	0.000610407	0.000643445	0.00387493	0.00427067	0.000597013	0.000620621	0.28808	0.209937	0.342277	0.25933	2025	Fontanella et al. 2025
