# Supplementary material
Source: Research Square preprint supplement (doi:10.21203/rs.3.rs-9214384/v1)
Supplement: Supplementary file 1 [file 65a415cc0382e797b2b8c7a6.doc]

| 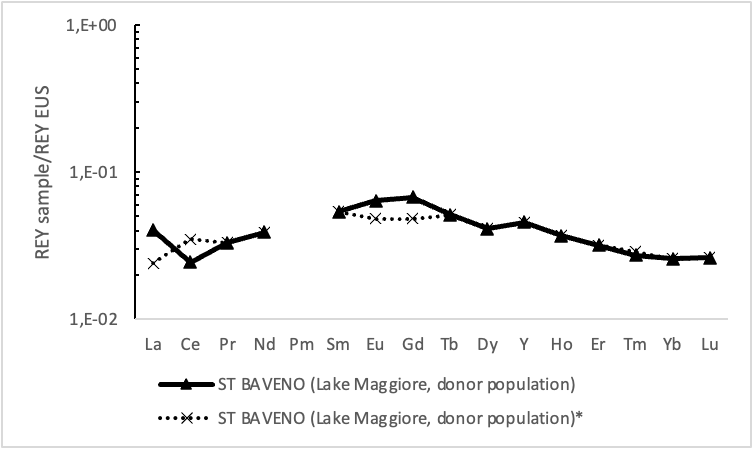 |
| --- |
| 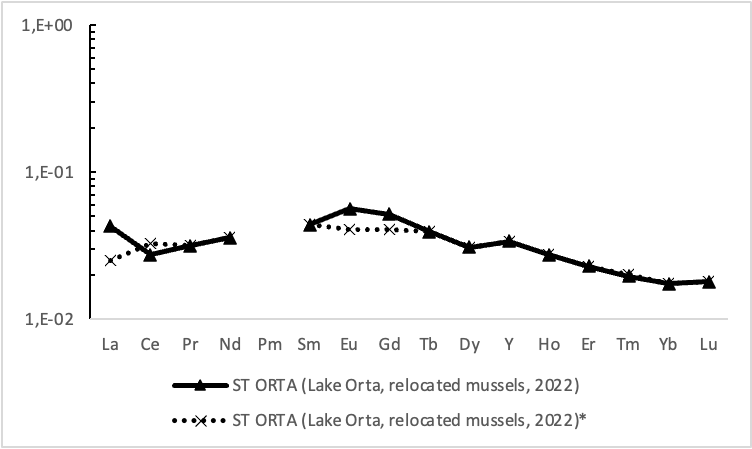 |
| 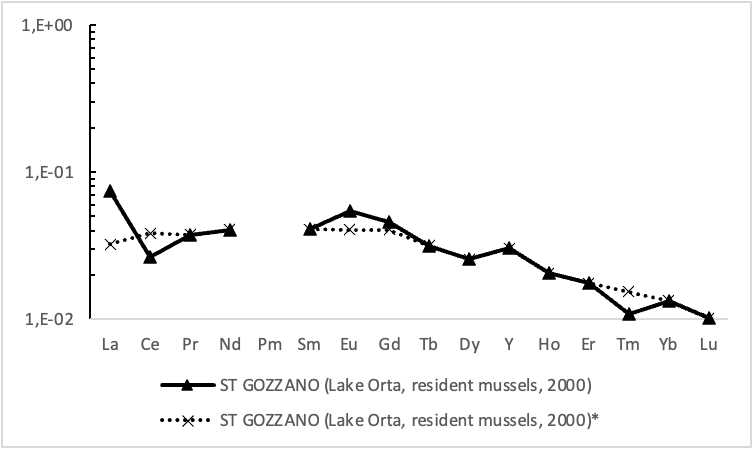 |

Fig. S1. Shale-normalized REY patterns of the soft tissues of *Unio* collected in Lake Maggiore (Baveno, site of donor population), Lake Orta (Orta, site of translocated mussels in 2022) and Lake Orta (Gozzano, site of resident mussels from 2000).

| 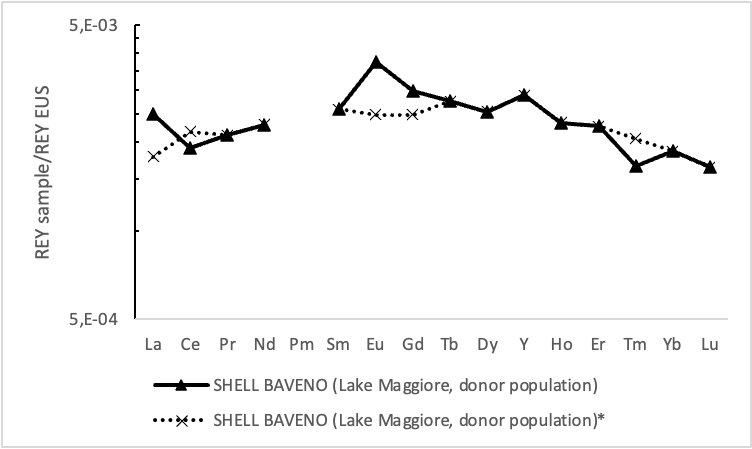 |
| --- |
| 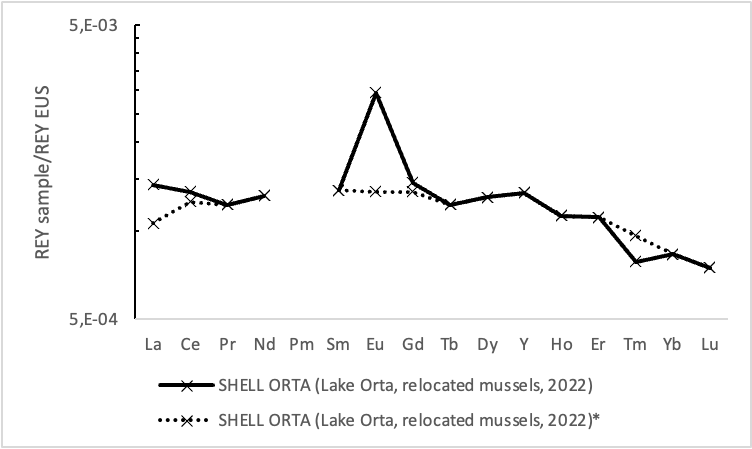 |
| 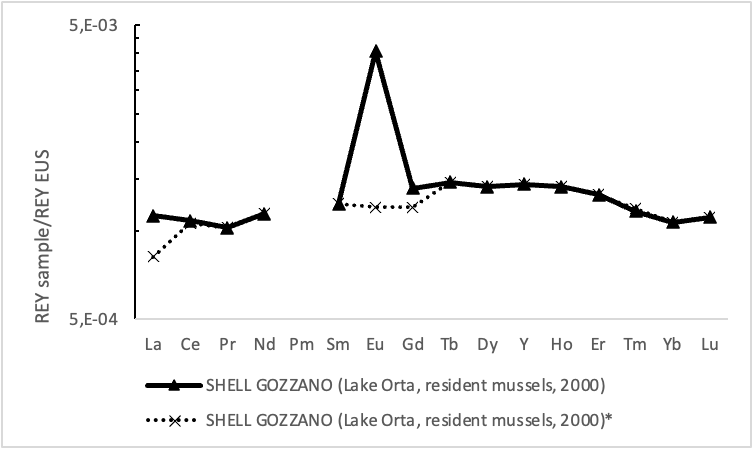 |

Fig. S2. Shale-normalized REY patterns of the shells of *Unio* collected in Lake Maggiore (Baveno, site of donor population), Lake Orta (Orta, site of translocated mussels in 2022) and Lake Orta (Gozzano, site of resident mussels from 2000).


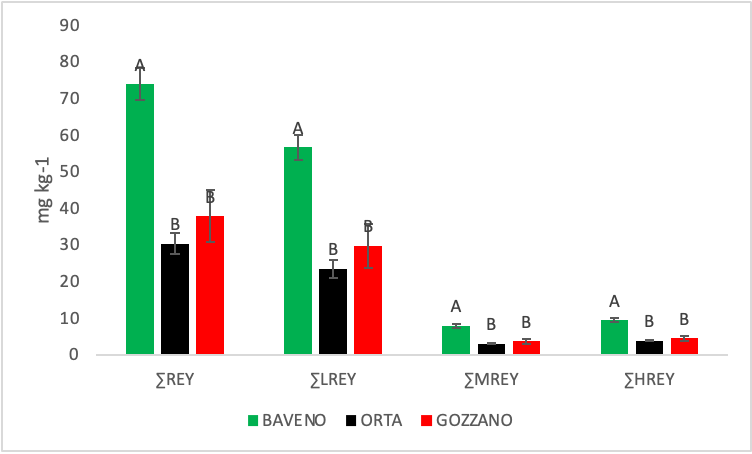


Fig. S3. Total REY, LREY, MREY and HREY concentration (mean ± SD) in sediment of Lake Maggiore (Baveno), Lake Orta (Orta) and Lake Orta (Gozzano).


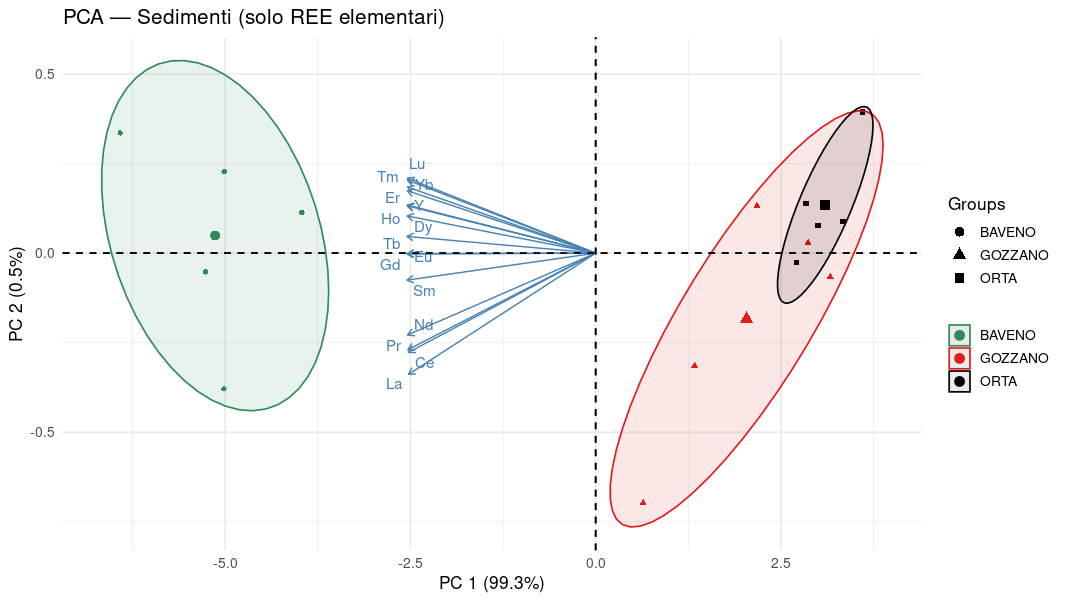


Fig. S4. PCA for sediments from Lake Maggiore (Baveno location), Lake Orta (Orta location) and Lake Orta (Gozzano location).


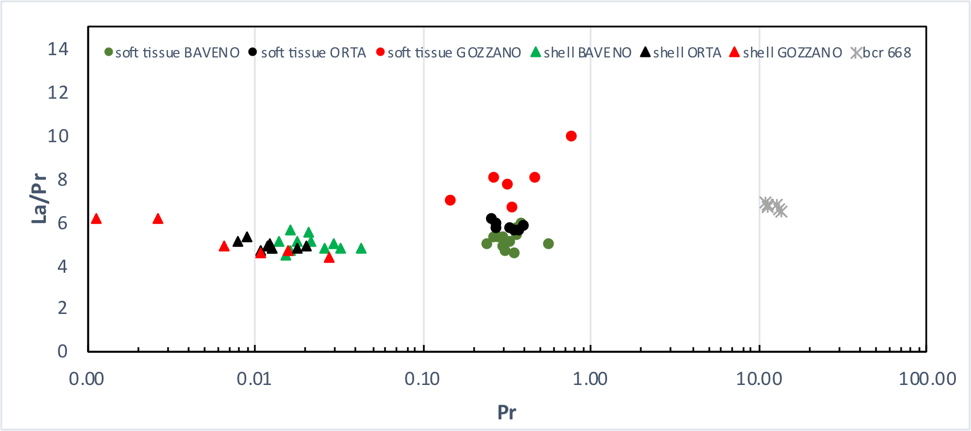


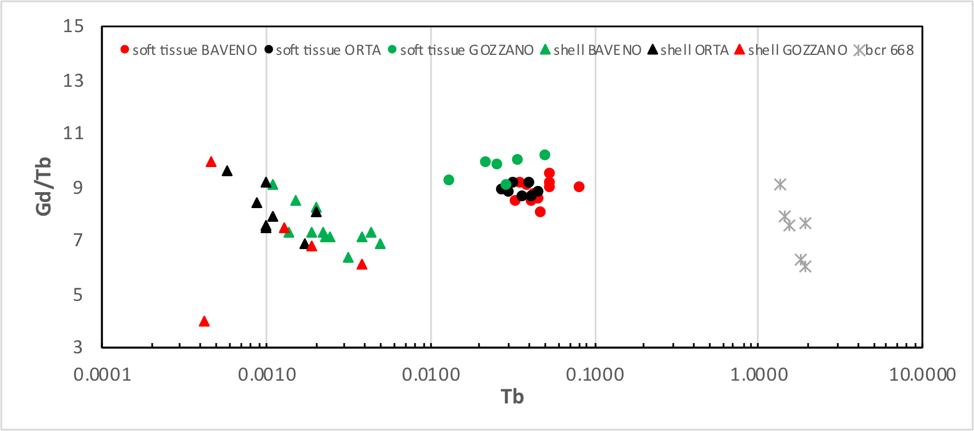


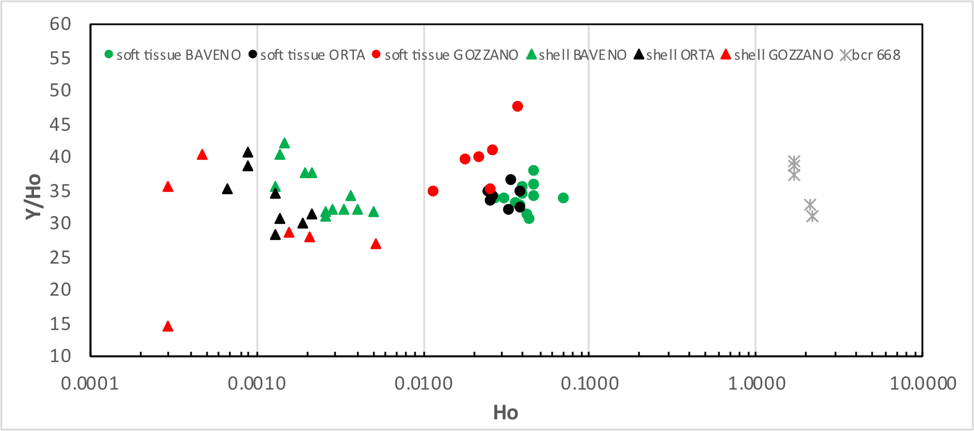


Fig. S5. La/Pr ratios vs [Pr] concentrations (A), Gd/Tb vs [Tb] (B), and Y/Ho vs [Y] (C) in soft tissues and shells of the *Unio* in this study, together with BCR 668 values.
