# Supplementary material
Source: Research Square preprint supplement (doi:10.21203/rs.3.rs-9214384/v1)
Supplement: Supplementary file 2 [file 80e897905ad9e99472871f87.docx]

Tab. S1. ICP-MS/MS operating conditions.

| **Instrument parameters** | **Settings** | |
| --- | --- | --- |
| RF Power (W) | | 1600 |
| Sampling Depth (mm) | | 9.0 |
| Plasma flow rate (L min-1) | | 15.0 |
| Carrier Gas (L min-1) | | Ar: 1.00 |
| Dilution Gas (L min-1) | | Ar: 0.20 |
| Tune mode | | O2 mode |
| He flow (ml min-1) | | 30% |
| Peltier-cooler multipass condenser | | 2°C |
| Internal standards | | Rh103 > 103 – Rh 103 > 119 |
| Selected isotopes | | Y 89 > 105 – La 139 > 155 – Ce 140 > 156 – Pr 141 > 157 – Nd 146 > 162 –Sm 147 > 163 – Eu 153 > 169 – Gd 157 > 173 – Tb 159 > 175 –  Dy 163 > 179 – Ho 165 > 181 – Er 166 > 182 – Tm 169 > 185 –  Yb 172 > 188 – Lu 175 > 191 |

Tab. S2. Validation parameters for the determinations of REY in shell and soft tissue of *Unio elogantus*: method detection limits (MDL), dynamic range, dependent coefficient of calibration curves (R2), certified reference material values (BCR 668 – mussel tissue), recovery on certified soils, and relative standard deviation (RSD).

|  | **MDL**  (μg/kg) | **BCR 668**  (μg/kg) | **Recovery**  (%) | **RSD**  (%) |
| --- | --- | --- | --- | --- |
| La | 0.27 | 80 ± 6 | 103 ± 8 | 8 |
| Ce | 0.33 | 89 ± 7 | 99 ± 8 | 8 |
| Pr | 0.03 | 12.3 ± 1.1 | 100 ± 9 | 9 |
| Nd | 0.21 | 54 ± 4 | 101 ± 9 | 9 |
| Sm | 0.01 | 11.2 ± 0.8 | 102 ± 14 | 14 |
| Eu | 0.03 | 2.79 ± 0.16 | 108 ± 12 | 11 |
| Gd | 0.06 | 13 ± 0.6 | 96 ± 11 | 11 |
| Tb | 0.42 | 1.62 ± 0.12 | 99 ± 15 | 15 |
| Dy | 0.60 | 8.9 ± 0.6 | 102 ± 13 | 13 |
| Y | 0.32 | 59 ± 5 | 112 ± 4 | 3 |
| Ho | 0.30 | 1.8 ± 0.6* | 108 ± 14* | 13 |
| Er | 0.02 | 4.5 ± 0.5 | 98 ± 16 | 16 |
| Tm | 0.30 | 0.48 ± 0.08 | 112 ± 20 | 18 |
| Yb | 0.60 | 2.8 ± 0.5* | 101 ± 17* | 17 |
| Lu | 0.15 | 0.389 ± 0.024 | 97 ± 10 | 10 |

Table S3. Mean concentrations (mg kg-1) of REY in soft tissues of *Unio elongatulus* collected in Lake Maggiore (Baveno, site of donor population), Lake Orta (Orta, site of translocated mussels in 2022) and Lake Orta (Gozzano, site of resident mussels from 2000).

| Soft tissue  mg kg-1 | BAVENO (Lake Maggiore) | | | ORTA (Lake Orta) | | | GOZZANO (Lake Orta) | | |
| --- | --- | --- | --- | --- | --- | --- | --- | --- | --- |
|  | n=12 |  | SD | n=7 |  | SD | n=6 |  | SD |
| La | 1.786 | A | ± 0.455 | 1.902 | A | ± 0.308 | 3.282 | A | ± 2.367 |
| Ce | 2.155 | A | ± 0.499 | 2.429 | A | ± 0.491 | 2.356 | A | ± 0.753 |
| Pr | 0.351 | A | ± 0.085 | 0.336 | A | ± 0.059 | 0.397 | A | ± 0.220 |
| Nd | 1.536 | A | ± 0.400 | 1.408 | A | ± 0.244 | 1.596 | A | ± 0.845 |
| Sm | 0.393 | A | ± 0.105 | 0.319 | A | ± 0.056 | 0.297 | A | ± 0.140 |
| Eu | 0.094 | A | ± 0.027 | 0.083 | A | ± 0.014 | 0.081 | A | ± 0.032 |
| Gd | 0.426 | A | ± 0.122 | 0.327 | A | ± 0.060 | 0.291 | A | ± 0.133 |
| Tb | 0.048 | B | ± 0.013 | 0.037 | AB | ± 0.007 | 0.030 | A | ± 0.013 |
| Dy | 0.241 | B | ± 0.062 | 0.181 | AB | ± 0.034 | 0.149 | A | ± 0.058 |
| Y | 1.456 | B | ± 0.392 | 1.080 | AB | ± 0.216 | 0.970 | A | ± 0.463 |
| Ho | 0.043 | B | ± 0.011 | 0.032 | AB | ± 0.006 | 0.024 | A | ± 0.009 |
| Er | 0.105 | B | ± 0.025 | 0.076 | A | ± 0.015 | 0.058 | A | ± 0.020 |
| Tm | 0.013 | C | ± 0.003 | 0.009 | B | ± 0.002 | 0.005 | A | ± 0.002 |
| Yb | 0.081 | B | ± 0.017 | 0.054 | A | ± 0.011 | 0.042 | A | ± 0.012 |
| Lu | 0.012 | C | ± 0.003 | 0.008 | B | ± 0.002 | 0.005 | A | ± 0.002 |
| ∑REY | 8.74 | A | ± 2.17 | 8.28 | A | ± 1.47 | 9.58 | A | ± 4.96 |
| ∑LREY | 5.83 | A | ± 1.41 | 6.07 | A | ± 1.09 | 7.63 | A | ± 4.08 |
| ∑MREY | 1.20 | A | ± 0.32 | 0.95 | A | ± 0.17 | 0.85 | A | ± 0.37 |
| ∑HREY | 1.71 | B | ± 0.45 | 1.26 | AB | ± 0.25 | 1.10 | A | ± 0.50 |

Table S4. Mean concentrations (mg kg-1) of REY in shells of *Unio elongatulus* collected in Lake Maggiore (Baveno, site of donor population), Lake Orta (Orta, site of translocated mussels in 2022) and Lake Orta (Gozzano, site of resident mussels from 2000).

| shell | BAVENO  (Lake Maggiore) | | | ORTA  (Lake Orta) | | | GOZZANO  (Lake Orta) | | |
| --- | --- | --- | --- | --- | --- | --- | --- | --- | --- |
| mg kg-1 | n=12 |  | SD | n=7 |  | SD | n=6 |  | SD |
| La | 0.1104 | B | ± 0.0421 | 0.0635 | AB | ± 0.0198 | 0.0584 | A | ± 0.0407 |
| Ce | 0.1685 | A | ± 0.0693 | 0.1200 | A | ± 0.0422 | 0.1126 | A | ± 0.0767 |
| Pr | 0.0223 | A | ± 0.0090 | 0.0130 | A | ± 0.0043 | 0.0128 | A | ± 0.0097 |
| Nd | 0.0905 | A | ± 0.0371 | 0.0519 | A | ± 0.0176 | 0.0532 | A | ± 0.0398 |
| Sm | 0.0188 | B | ± 0.0078 | 0.0100 | A | ± 0.0038 | 0.0107 | AB | ± 0.0090 |
| Eu | 0.0055 | A | ± 0.0017 | 0.0044 | A | ± 0.0007 | 0.0065 | A | ± 0.0022 |
| Gd | 0.0189 | B | ± 0.0080 | 0.0092 | A | ± 0.0034 | 0.0104 | AB | ± 0.0084 |
| Tb | 0.0026 | B | ± 0.0012 | 0.0012 | A | ± 0.0005 | 0.0016 | AB | ± 0.0014 |
| Dy | 0.0149 | A | ± 0.0062 | 0.0076 | A | ± 0.0025 | 0.0098 | A | ± 0.0093 |
| Y | 0.0920 | B | ± 0.0340 | 0.0430 | A | ± 0.0142 | 0.0542 | AB | ± 0.0509 |
| Ho | 0.0027 | A | ± 0.0012 | 0.0013 | A | ± 0.0005 | 0.0019 | A | ± 0.0020 |
| Er | 0.0075 | A | ± 0.0028 | 0.0037 | A | ± 0.0013 | 0.0052 | A | ± 0.0051 |
| Tm | 0.0008 | B | ± 0.0004 | 0.0004 | A | ± 0.0001 | 0.0006 | AB | ± 0.0006 |
| Yb | 0.0058 | A | ± 0.0025 | 0.0026 | A | ± 0.0012 | 0.0039 | A | ± 0.0043 |
| Lu | 0.0008 | A | ± 0.0004 | 0.0004 | A | ± 0.0002 | 0.0006 | A | ± 0.0006 |
| ∑REY | 0.56 | A | ± 0.22 | 0.33 | A | ± 0.11 | 0.34 | A | ± 0.26 |
| ∑LREY | 0.39 | A | ± 0.16 | 0.25 | A | ± 0.08 | 0.24 | A | ± 0.17 |
| ∑MREY | 0.06 | A | ± 0.02 | 0.03 | A | ± 0.01 | 0.04 | A | ± 0.03 |
| ∑HREY | 0.11 | B | ± 0.04 | 0.05 | A | ± 0.02 | 0.07 | AB | ± 0.06 |

Table S5. Mean concentrations (mg kg-1) of REY in sediments of Lake Maggiore (Baveno location), Lake Orta (Orta location) and Lake Orta (Gozzano location).

| sediment | BAVENO |  | SD | ORTA |  | SD | GOZZANO |  | SD |
| --- | --- | --- | --- | --- | --- | --- | --- | --- | --- |
| mg kg-1 | n=5 |  |  | n=5 |  |  | n=5 |  |  |
| La | 13.73 | A | ± 0.83 | 5.51 | B | ± 0.53 | 7.17 | B | ± 1.64 |
| Ce | 26.66 | A | ± 1.80 | 11.50 | B | ± 1.40 | 14.37 | B | ± 2.74 |
| Pr | 3.29 | A | ± 0.21 | 1.33 | B | ± 0.12 | 1.69 | B | ± 0.34 |
| Nd | 12.92 | A | ± 0.81 | 5.14 | B | ± 0.45 | 6.49 | B | ± 1.27 |
| Sm | 2.90 | A | ± 0.17 | 1.07 | B | ± 0.09 | 1.31 | B | ± 0.24 |
| Eu | 0.35 | A | ± 0.02 | 0.16 | B | ± 0.01 | 0.17 | B | ± 0.03 |
| Gd | 2.54 | A | ± 0.17 | 0.94 | B | ± 0.06 | 1.14 | B | ± 0.19 |
| Tb | 0.34 | A | ± 0.03 | 0.13 | B | ± 0.01 | 0.16 | B | ± 0.02 |
| Dy | 1.76 | A | ± 0.14 | 0.72 | B | ± 0.04 | 0.85 | B | ± 0.12 |
| Y | 7.41 | A | ± 0.46 | 3.05 | B | ± 0.12 | 3.53 | B | ± 0.53 |
| Ho | 0.31 | A | ± 0.02 | 0.13 | B | ± 0.01 | 0.15 | B | ± 0.02 |
| Er | 0.82 | A | ± 0.06 | 0.33 | B | ± 0.02 | 0.38 | B | ± 0.05 |
| Tm | 0.11 | A | ± 0.01 | 0.04 | B | ± 0.00 | 0.05 | B | ± 0.01 |
| Yb | 0.67 | A | ± 0.05 | 0.26 | B | ± 0.01 | 0.29 | B | ± 0.04 |
| Lu | 0.09 | A | ± 0.01 | 0.04 | B | ± 0.00 | 0.04 | B | ± 0.01 |
| ∑REY | 73.89 | A | ± 4.39 | 30.33 | B | ± 2.80 | 37.81 | B | ± 7.18 |
| ∑LREY | 56.59 | A | ± 3.48 | 23.47 | B | ± 2.50 | 29.73 | B | ± 5.98 |
| ∑MREY | 7.89 | A | ± 0.51 | 3.02 | B | ± 0.20 | 3.64 | B | ± 0.60 |
| ∑HREY | 9.41 | A | ± 0.61 | 3.84 | B | ± 0.16 | 4.44 | B | ± 0.65 |

Table S6. Rare earth element concentrations normalized to European Shale (REYEUS) in sediment collected in Lake Maggiore (Baveno), Lake Orta (Orta) and Lake Orta (Gozzano). Gd, La, Ce, Eu and Tm anomalies are represented by GdSN/Gd*SN, LaSN/La*SN, CeSN/Ce*SN, EuSN/Eu*SN and TmSN/Tm*SN.

| REY/European shale | BAVENO | SD | ORTA | SD | GOZZANO | SD |
| --- | --- | --- | --- | --- | --- | --- |
| sediment | n=5 |  | n=5 |  | n=5 |  |
| La | 0.310 | ± 0.019 | 0.124 | ± 0.012 | 0.162 | ± 0.037 |
| Ce | 0.301 | ± 0.020 | 0.130 | ± 0.016 | 0.162 | ± 0.031 |
| Pr | 0.310 | ± 0.020 | 0.125 | ± 0.012 | 0.160 | ± 0.032 |
| Nd | 0.327 | ± 0.021 | 0.130 | ± 0.011 | 0.164 | ± 0.032 |
| Sm | 0.397 | ± 0.024 | 0.146 | ± 0.012 | 0.180 | ± 0.033 |
| Eu | 0.239 | ± 0.012 | 0.108 | ± 0.009 | 0.118 | ± 0.018 |
| Gd | 0.401 | ± 0.026 | 0.148 | ± 0.010 | 0.180 | ± 0.030 |
| Tb | 0.356 | ± 0.027 | 0.139 | ± 0.008 | 0.167 | ± 0.024 |
| Dy | 0.299 | ± 0.024 | 0.123 | ± 0.006 | 0.145 | ± 0.021 |
| Y | 0.232 | ± 0.015 | 0.096 | ± 0.004 | 0.111 | ± 0.017 |
| Ho | 0.264 | ± 0.021 | 0.108 | ± 0.006 | 0.127 | ± 0.017 |
| Er | 0.247 | ± 0.020 | 0.099 | ± 0.005 | 0.115 | ± 0.015 |
| Tm | 0.232 | ± 0.019 | 0.091 | ± 0.005 | 0.103 | ± 0.013 |
| Yb | 0.215 | ± 0.015 | 0.083 | ± 0.003 | 0.094 | ± 0.012 |
| Lu | 0.195 | ± 0.015 | 0.078 | ± 0.005 | 0.087 | ± 0.012 |
| (La/Sm)SN | 0.78 | ± 0.01 | 0.85 | ± 0.02 | 0.89 | ± 0.04 |
| (Gd/Yb) SN | 1.87 | ± 0.08 | 1.78 | ± 0.06 | 1.90 | ± 0.12 |
| Gd SN /Gd* SN | 1.08 | ± 0.03 | 1.05 | ± 0.02 | 1.03 | ± 0.03 |
| La SN /La* SN | 1.11 | ± 0.01 | 1.07 | ± 0.01 | 1.07 | ± 0.02 |
| Ce SN /Ce* SN | 0.95 | ± 0.04 | 1.02 | ± 0.04 | 1.01 | ± 0.02 |
| **Eu** SN **/Eu*** SN | **0.64** | ± **0.02** | **0.77** | ± **0.02** | **0.68** | ± **0.03** |
| Tm SN /Tm* SN | 1.01 | ± 0.01 | 1.00 | ± 0.01 | 0.99 | ± 0.01 |
