# Supplementary material
Source: Research Square preprint supplement (doi:10.21203/rs.3.rs-9214384/v1)
Supplement: Supplementary file 3 [file b5b824de9717b940e9505ba4.xlsx]

## Sheet: LIT_whole organism
				mg kg-1		mg kg-1		mg kg-1		mg kg-1		mg kg-1		mg kg-1		mg kg-1		mg kg-1		mg kg-1		mg kg-1		mg kg-1		mg kg-1		mg kg-1		mg kg-1		mg kg-1		mg kg-1		mg kg-1		Reference_year
Country	Phylum: Mollusca/Class: Bivalva	Weight	Tissues	La	±SD	Ce	±SD	Pr	±SD	Nd	±SD	Sm	±SD	Eu	±SD	Gd	±SD	Tb	±SD	Dy	±SD	Y	±SD	Ho	±SD	Er	±SD	Tm	±SD	Yb	±SD	Lu	±SD	∑REE	±SD	∑REY	±SD	Reference_year	Reference
France	Pisidium sp.	DW	whole organism	0.5348		0.841		0.0887		0.3669		0.0786		0.0179		0.0825		0.0105		0.0542				0.0098		0.0247		0.0032		0.0195		0.0028		2.1351				2020	Andrade et al. (2020)
France (media)	Corbicula fluminea (media)		whole organism (average)	0.290879	0.168468	0.540073	0.310669	0.0775279	0.0448085	0.35071	0.201001	0.0800135	0.04627	0.0204046	0.0127	0.0792169	0.0431792	0.00949204	0.00558439	0.0556001	0.032846			0.0110758	0.00654117	0.0290278	0.016762	0.00352385	0.0020663	0.0195078	0.011578	0.00302287	0.00167656	1.57008	0.90415			2020	Pereto et al. (2020)
Spain	Corbicula fluminea (media)		whole organism (average)	0.45775	0.647542	0.88275	1.39768	0.107	0.159242	0.51025	0.719665	0.12475	0.174788	0.029	0.0401829	0.1495	0.208987	0.01925	0.0288603	0.0967512	0.142859			0.018	0.0269815	0.04425	0.0666402	0.00475	0.00754431	0.028	0.04312	0.0035	0.00568624	2.4755	3.66546			2017	Bonnail et al. (2017)
Canada	freshwater bivalve (UD) (media)		whole organism (average)																															0.796333	0.610914			2017	Amyot et al. (2017)
China	Corbicula fluminea (media)		whole organism (average)	0.273533	0.115664	0.120077	0.0567178	0.0558667	0.0198209	0.1996	0.0671489	0.0598533	0.0214167	0.0112	0.00486401	0.0519333	0.0163344	0.006	0.00214009	0.0411	0.0154396			0.006982	0.00159105	0.02104	0.0094878	0.00286667	0.000761715	0.01222	0.00393867	0.00189333	0.000575036	0.864165	0.327945			2022	Z. Wang et al. (2022)
Malaysia	freshwater clam (UD)	DW	whole organism	1.15933		2.517		0.264241		0.98245		0.188229		0.019166		0.545007		0.03494		0.142932				0.027734		0.096009		0.011945		0.084006		0.013746		6.08674				2014	Daud et al. (2014)
Nigeria	Anodonta anatina	DW	whole organism	76								0		0.57																0.39		0.39						2013	Katsallah et al. (2013)
Nigeria	Anodonta marginata	DW	whole organism	65								0		0.67																0.65		0.14						2013	Katsallah et al. (2013)
Nigeria	Anodonta implicata	DW	whole organism	67.4								3.95		0.8																0.66		0.1						2013	Katsallah et al. (2013)
Italy (Lake Maggiore)	Unio	DW	soft tissue (average)	1.78555	0.454881	2.15456	0.498954	0.351119	0.0852399	1.53604	0.399737	0.392592	0.10458	0.0944495	0.0274608	0.42576	0.121828	0.048389	0.0129863	0.240658	0.0620241	1.45607	0.392024	0.0432954	0.0110082	0.105086	0.0249414	0.0131027	0.00288881	0.0806058	0.0173234	0.0122597	0.00286975	7.28347		8.73954	2.16899	2025	Fontanella et al. 2025
Italy (Lake Orta - Orta)	Unio	DW	soft tissue (average)	1.90178	0.308251	2.42914	0.491216	0.335736	0.0594677	1.40753	0.244409	0.319119	0.0559038	0.083099	0.0135061	0.327106	0.0602839	0.0369969	0.00698625	0.181142	0.0338949	1.07994	0.215678	0.0320883	0.00620634	0.0757684	0.0149774	0.00936709	0.00198984	0.0544848	0.0114494	0.0084497	0.00179666	7.20181		8.28174	1.47152	2025	Fontanella et al. 2025
Italy (Lake Orta - Gozzano)	Unio	DW	soft tissue (average)	3.28157	2.36684	2.35594	0.753006	0.397398	0.219563	1.5956	0.844621	0.297329	0.140227	0.0806412	0.0318288	0.290845	0.133161	0.0297692	0.0127612	0.149322	0.0581713	0.969736	0.462502	0.0239716	0.00878639	0.0579782	0.0197356	0.00519317	0.00186569	0.0416074	0.012092	0.00476956	0.00166785	8.61193		9.58167	4.95608	2025	Fontanella et al. 2025
